# Supplementary material
Source: publisher figshare collection journal article supplement (https://gsapubs.figshare.com/articles/dataset/_/24514090)
Supplement: Supplementary file 1 [file 2]

Zhang, H.X., Jiang, S.Y., Liu, S.Q., Yuan, F., Chen, W., and Su, H.M., 2023, U-Th-Pb dating, trace elements, and Sr-Nd isotopes of monazite and allanite as recorders for multi-stage rare earth element mineralization and remobilization in carbonatite dike systems: GSA Bulletin, <https://doi.org/10.1130/B36931.1>.

## Supplemental Material

**Table S1.** The chemical compositions of allanite and monazite from the Huangjiagou carbonatite.

**Table S2.** The U-Th-Pb dating of monazite and allanite from the Huangjiagou carbonatite.

**Table S3.** The Sr-Nd isotope data of monazite and allanite from the Huangjiagou carbonatite.
