# Supplementary material
Source: publisher figshare collection journal article supplement (https://gsapubs.figshare.com/articles/dataset/_/24514090)
Supplement: Supplementary file 1 [file 2]

## Sheet: allanite
Supplementary Table 1. The chemical compositions of allanite for Huangjiagou carbonatite.
	LA-ICP-MS data																									Allanite formulae were calculated by normalizing to 8 cations
	Al2O3	SiO2	CaO	TiO2	V	MnO	FeO	Sr	Y	La	Ce	Pr	Nd	Sm	Eu	Gd	Tb	Dy	Ho	Er	Tm	Yb	Lu	Th	U	Ca	La	Ce	Pr	Nd	Sm	Eu	Gd	Tb	Dy	Ho	Er	Tm	Yb	Lu	Th	U	Ti	Sr	Y	Mn	V	Fe3+	Fe2+
	wt%	wt%	wt%	wt%	ppm	wt%	wt%	ppm	ppm	ppm	ppm	ppm	ppm	ppm	ppm	ppm	ppm	ppm	ppm	ppm	ppm	ppm	ppm	ppm	ppm
v-1-01(core)	10.266	31.051	9.66134	0.301736	953.445	0.584181	19.2117	850.577	357.509	76994.4	115342	9123.52	25438.1	1839.79	215.093	696.616	40.0431	111.829	13.5505	27.8817	3.41739	22.6388	3.16098	1333.86	30.2628	0.980389	0.337254	0.501618	0.0393963	0.106083	0.00762014	0.000855947	0.00270151	0.000153335	0.000417713	5.00015e-05	0.000102264	1.23118e-05	8.01377e-05	1.09975e-05	0.00350053	7.74184e-05	0.0226806	0.00588496	0.00244573	0.0500958	0.0113825	0.51904	1.0833
v-1-02(core)	12.1097	31.9375	10.7625	0.554513	1582.56	0.579857	18.0482	2716.21	488.253	68636	99242.7	8301.77	24226.6	2061.93	337.05	833.076	55.665	165.387	19.1916	33.3159	3.29176	18.264	2.25335	2384.12	74.0841	1.05864	0.291423	0.418367	0.0347486	0.0979324	0.00827832	0.00130014	0.00313164	0.00020662	0.000598826	6.86458e-05	0.000118448	1.14955e-05	6.26692e-05	7.59935e-06	0.00606494	0.000183711	0.040403	0.0182166	0.00323774	0.0482002	0.0183137	0.465748	0.993392
v-1-03(core)	12.516	31.0612	9.70941	0.38831	1721.29	0.921064	17.1852	1716.81	330.31	71430.5	111783	9443.85	27588.7	2300.63	361.089	864.469	54.6804	141.933	14.9803	21.3959	1.84111	8.03508	1.11699	785.505	30.8547	0.969733	0.30795	0.478476	0.0401366	0.113237	0.00937867	0.00141427	0.0032996	0.000206084	0.000521805	5.44061e-05	7.72385e-05	6.52837e-06	2.79945e-05	3.82491e-06	0.00202895	7.76882e-05	0.0287279	0.0116909	0.00222404	0.0777396	0.0202253	0.399336	1.01139
v-1-04(core)	10.5536	31.0555	11.4037	0.741979	1280.06	0.524716	19.8115	3909.9	252.324	71738.9	96857.8	7926.27	22904.4	1676.19	246.932	598.609	33.5995	85.784	9.31329	16.4896	1.61549	9.92343	1.26216	4532.15	89.1944	1.12867	0.306488	0.410846	0.0333828	0.0931619	0.00677139	0.000958428	0.00226421	0.00012549	0.00031253	3.35191e-05	5.89895e-05	5.67663e-06	3.42615e-05	4.283e-06	0.0116008	0.000222553	0.0543976	0.0263849	0.00168361	0.0438873	0.014905	0.747427	0.864208
v-1-05(core)	12.4488	30.8758	9.83255	0.38481	1768.99	0.998044	17.1153	2147.72	443.999	73463.6	110884	9258.2	26678.6	2304.39	369.283	894.313	61.1921	178.353	19.2022	30.0132	2.87862	13.5378	1.62073	881.34	49.4886	0.983012	0.317031	0.4751	0.0393869	0.109611	0.00940333	0.00144781	0.00341691	0.000230857	0.000656352	6.98087e-05	0.000108455	1.02174e-05	4.72134e-05	5.55543e-06	0.00227876	0.00012473	0.0284974	0.01464	0.00299251	0.0843209	0.0208065	0.435872	0.970518
v-1-06(core)	10.9736	31.2605	11.2208	1.33283	816.455	0.631455	18.4853	4444.96	317.432	71355.5	100142	8177.38	23198.2	1699.59	247.676	625.685	41.8974	116.779	13.0996	20.0026	1.86642	10.8786	1.65128	1570.01	31.3961	1.11043	0.304813	0.424726	0.0344362	0.0943457	0.00686513	0.000961198	0.00236634	0.000156463	0.0004254	4.71405e-05	7.15482e-05	6.55756e-06	3.75548e-05	5.60279e-06	0.00401824	7.83284e-05	0.0977034	0.029992	0.00211778	0.0528086	0.00950567	0.582093	0.92148
v-1-07(core)	12.3214	31.4977	11.4921	0.494679	1182.63	0.524769	18.3338	2659.22	418.198	66497.4	99001.8	8107.5	22905.4	1866.58	275.164	727.873	46.8935	136.889	15.8185	28.2272	2.66136	16.6461	2.09063	2469.59	62.5648	1.12412	0.280772	0.41503	0.0337468	0.0920767	0.00745234	0.00105551	0.00272095	0.000173093	0.000492885	5.62658e-05	9.97984e-05	9.24233e-06	5.68e-05	7.01136e-06	0.00624743	0.000154283	0.0358428	0.0177352	0.00275776	0.0433785	0.0136095	0.604199	0.869786
v-1-08(core)	11.0237	30.9353	9.51829	0.542862	1844.16	0.923902	17.4704	2072.32	535.557	78859.4	115794	9546.58	26392.4	2276.34	387.499	834.704	60.2104	187.684	21.9942	41.3886	4.38482	25.3164	3.01665	944.601	32.9996	0.965255	0.345201	0.503261	0.0411967	0.109992	0.00942222	0.00154104	0.00323494	0.000230414	0.000700607	8.11068e-05	0.000151707	1.5787e-05	8.95585e-05	1.04887e-05	0.00247739	8.43656e-05	0.0407792	0.0143288	0.00366142	0.0791774	0.022002	0.400163	1.05602
v-1-09(core)	11.6944	31.1027	10.55	0.569963	1347.02	0.681297	17.7702	3727.77	553.703	73015.4	107829	8874.88	24905.8	2070.09	337.245	800.482	59.174	182.4	22.3449	40.2593	4.31037	25.2216	3.39193	960.585	60.4643	1.05112	0.314014	0.460425	0.0376264	0.101976	0.00841825	0.00131766	0.0030479	0.000222476	0.000668938	8.09551e-05	0.00014498	1.52467e-05	8.76584e-05	1.15867e-05	0.00247512	0.00015187	0.042064	0.025323	0.00371908	0.0573624	0.0157889	0.521572	0.933613
v-1-10(core)	10.8463	30.4338	10.273	0.523265	962.157	0.561176	18.4974	2059.28	208.802	85880.2	112588	8557.43	22480	1555.02	209.225	543.493	32.891	83.1996	8.63718	14.5257	1.17559	7.39957	0.995042	658.307	17.877	1.0372	0.374277	0.48717	0.0367654	0.0932735	0.00640816	0.000828392	0.00209705	0.000125313	0.000309206	3.17105e-05	5.30082e-05	4.21391e-06	2.60611e-05	3.44444e-06	0.00171892	4.55022e-05	0.0391338	0.0141758	0.00142122	0.0478802	0.0114285	0.585169	0.949807
v-1-11(core)	11.7198	29.6266	10.7793	0.462835	1560	0.803277	17.0613	4570.68	601.631	79821.5	106651	8506.31	23759.3	1968.82	313.824	792.145	59.7552	194.722	23.8913	43.3413	4.08737	21.0903	2.63641	2436.48	123.251	1.09372	0.3496	0.46377	0.0367273	0.099071	0.00815372	0.00124871	0.00307164	0.000228794	0.000727267	8.815e-05	0.00015895	1.47239e-05	7.46483e-05	9.1715e-06	0.00639354	0.000315267	0.0347862	0.0316202	0.00411534	0.0688768	0.0186218	0.650378	0.772464
v-1-12(core)	11.8292	30.6564	9.87596	0.481087	1543.86	0.820187	16.9697	2426.38	570.29	78005.8	112890	9287.12	26394.5	2214.86	352.696	877.811	62.5642	193.281	22.5971	40.2357	3.61335	17.3825	1.94596	1745.19	112.334	0.997412	0.340062	0.488624	0.0399124	0.109549	0.00913008	0.00139687	0.00338803	0.000238438	0.000718537	8.2988e-05	0.000146876	1.29559e-05	6.12394e-05	6.73817e-06	0.00455827	0.00028601	0.0359903	0.0167079	0.00388287	0.0700005	0.0183435	0.423251	0.985384
v-1-13(core)	9.98418	30.5491	9.77777	0.45833	1008.6	0.547798	19.1943	794.132	335.134	81752.1	117109	8934.28	23753.4	1609.25	199.365	620.922	36.1736	104.176	13.3182	27.6338	3.25493	21.8924	3.35072	1128.67	30.8882	0.997919	0.360157	0.512237	0.0388014	0.0996278	0.00670369	0.000797931	0.00242184	0.000139316	0.00039137	4.94275e-05	0.000101939	1.1794e-05	7.79419e-05	1.17248e-05	0.00297912	7.94735e-05	0.0346497	0.00552608	0.00230587	0.0472464	0.0121104	0.561859	1.04826
v-1-14(core)	11.4009	30.7773	10.6395	0.606476	1603.6	0.799431	18.2197	1798.1	370.968	73581.9	106770	8737.1	23726.9	1876.81	293.718	662.834	45.0809	133.091	15.3244	26.6862	2.62476	15.6081	1.90733	1934.59	35.26	1.0635	0.317488	0.457394	0.0371637	0.0974672	0.00765728	0.00115136	0.00253207	0.000170046	0.000489703	5.5702e-05	9.64162e-05	9.31479e-06	5.44243e-05	6.5367e-06	0.00500115	8.88537e-05	0.0449055	0.0122547	0.00249987	0.0675294	0.018858	0.576401	0.920484
v-1-15(core)	11.0918	31.2675	9.73092	0.646581	1638.97	0.77283	18.7055	1746.77	399.673	73477.4	107236	8709.28	23874.3	1926.07	312.374	703.181	48.0022	144.317	16.4236	29.2846	2.84797	14.7203	1.86123	2189.97	43.3307	0.976946	0.318425	0.461402	0.0372075	0.0985022	0.00789265	0.00122985	0.00269796	0.000181858	0.000533331	5.99587e-05	0.000106267	1.01512e-05	5.15534e-05	6.40662e-06	0.00568614	0.00010967	0.0480846	0.011957	0.0027051	0.0655682	0.0193584	0.468377	1.07515
v-1-16(core)	9.9947	30.3829	9.60455	0.409304	1011.36	0.56072	20.2591	730.451	334.929	80384.3	113437	8660.87	21919.5	1492.21	178.923	506.164	31.7691	97.4004	12.3005	28.2127	3.60891	22.9428	3.33368	1774.58	24.5609	0.977445	0.353121	0.494761	0.0375067	0.0916734	0.00619837	0.00071407	0.0019686	0.000122004	0.000364871	4.55204e-05	0.000103777	1.30394e-05	8.14488e-05	1.1632e-05	0.00467063	6.30136e-05	0.0308551	0.00506845	0.00229789	0.048223	0.0121088	0.65342	1.04117
v-1-17(core)	10.3502	30.4682	9.70012	0.391272	925.97	0.570375	20.2451	881.148	427.034	75100.8	110771	8880.24	24341.7	1837.17	214.568	654.37	42.1918	129.315	16.3238	34.0786	4.07233	27.8518	3.84505	2097.56	56.2498	0.982343	0.328297	0.480767	0.0382687	0.101306	0.00759398	0.000852139	0.00253257	0.000161238	0.000482057	6.01138e-05	0.000124742	1.46418e-05	9.83927e-05	1.33506e-05	0.00549368	0.000143609	0.0293515	0.0060842	0.00291548	0.0488135	0.0110323	0.658458	1.02667
v-1-18(core)	12.4351	31.2323	10.0669	0.463749	1399.79	0.783741	17.7797	1755.02	318.822	73008.8	106477	8744.9	24132.4	1896.99	292.681	671.274	42.9764	119.396	13.2907	23.3958	2.2799	13.733	1.82406	1464.55	35.9686	0.999418	0.312871	0.453034	0.0369437	0.0984583	0.00768692	0.00113948	0.00254686	0.000161004	0.000436322	4.79809e-05	8.39526e-05	8.03589e-06	4.75598e-05	6.20878e-06	0.00376029	9.00224e-05	0.0341038	0.0118797	0.00213385	0.0657534	0.0163493	0.451905	0.998892
v-1-19(core)	9.74158	26.913	9.48575	0.425733	1102.04	0.799674	16.8392	1348.08	439.483	84870.9	126340	10321.5	28583.5	2193.07	342.388	816.166	54.0112	159.838	18.69	31.2559	3.19997	19.2491	2.36324	2235.15	75.4778	1.03391	0.399305	0.590164	0.0478724	0.128033	0.00975655	0.00146348	0.00339969	0.00022215	0.000641288	7.40776e-05	0.000123136	1.23828e-05	7.31883e-05	8.83143e-06	0.00630056	0.000207397	0.0343726	0.0100183	0.00322933	0.0736572	0.0141315	0.709928	0.79862
v-1-20(core)	10.8835	31.9546	9.68086	0.401065	1136.63	0.610545	19.1654	1467.7	272.813	75119	108121	8329.36	21683.4	1464.18	190.256	499.057	31.2666	86.7005	10.3771	21.9417	2.40512	17.4366	2.40281	1102.97	24.3916	0.968366	0.324349	0.463512	0.0354543	0.0891358	0.00597798	0.000746317	0.00190777	0.000118021	0.000319235	3.77459e-05	7.93301e-05	8.54137e-06	6.0843e-05	8.24057e-06	0.00285334	6.15092e-05	0.0297171	0.01001	0.00183972	0.0516102	0.013376	0.439053	1.13664
v-1-21(core)	12.4194	31.6058	10.6214	0.413468	1217.24	0.686424	18.0011	2739.56	376.229	69505.3	103062	8352.79	23140.8	1846.27	291.785	671.001	45.2608	130.766	14.851	28.3329	3.1596	20.3682	3.08839	1407.41	32.706	1.04594	0.295445	0.434954	0.0350014	0.0936478	0.00742079	0.00112679	0.0025252	0.000168189	0.000474004	5.31796e-05	0.000100845	1.10464e-05	6.99675e-05	1.04272e-05	0.00358431	8.1194e-05	0.0301599	0.0183938	0.00249767	0.0571225	0.014102	0.501625	0.955344
v-1-22(core)	12.0627	30.8728	9.73666	0.629213	1629.78	0.83605	17.2243	1909.24	409.621	74652.2	111257	9039.61	25705.3	2033.79	346.745	823.303	52.4972	155.129	16.4078	29.0722	2.72598	16.2356	1.90858	1950.33	32.7735	0.978622	0.32388	0.479241	0.0386622	0.106176	0.00834342	0.0013667	0.0031624	0.000199111	0.000573934	5.99683e-05	0.000105615	9.72731e-06	5.69239e-05	6.57701e-06	0.00506964	8.30428e-05	0.0468456	0.0130838	0.00277554	0.0710118	0.0192715	0.394555	1.02834
v-1-23(core)	12.2767	30.9686	10.0513	0.431988	1637.49	0.879521	17.6438	2089.29	439.891	72085.2	108745	8918	26405.1	2126.64	340.139	792.425	54.8351	158.591	17.9863	32.0398	3.4116	20.1331	2.65394	947.749	34.3061	1.00152	0.310042	0.464377	0.0378126	0.108124	0.00864901	0.00132909	0.0030175	0.000206182	0.000581674	6.51697e-05	0.000115391	1.20687e-05	6.99796e-05	9.06653e-06	0.00244227	8.61753e-05	0.0318842	0.014194	0.00295491	0.0740588	0.0191954	0.479351	0.965621
v-1-24(core)	11.5526	31.0296	9.87425	0.702695	2028.07	1.00869	18.2473	2783.3	664.66	70221.6	105056	8831.74	26862.5	2324.63	381.671	897.11	67.3701	218.001	26.269	46.4687	4.56031	21.432	2.36949	1726.92	141.473	0.986806	0.302925	0.449957	0.0375583	0.110325	0.00948235	0.00149581	0.00342629	0.000254067	0.000801955	9.54637e-05	0.000167854	1.61803e-05	7.47157e-05	8.11887e-06	0.00446337	0.00035643	0.0520188	0.0189651	0.00447804	0.0851875	0.0238447	0.501717	0.99712
v-1-25(core)	11.3393	31.5991	9.6109	0.580443	2016.51	0.717644	17.9874	1428.84	301.781	75479.6	109891	8803.63	25163.2	1887.88	283.075	639.199	42.8495	119.003	12.6806	20.5303	1.88664	7.47744	0.750962	933.684	32.5523	0.964352	0.326917	0.472561	0.0375894	0.103761	0.00773176	0.00111386	0.00245109	0.000162245	0.000439534	4.62677e-05	7.44577e-05	6.72087e-06	2.61726e-05	2.58346e-06	0.00242289	8.2343e-05	0.0431417	0.00977515	0.00204138	0.0608517	0.0238042	0.36388	1.11955
v-1-26(core)	11.7809	31.2847	9.64822	0.552786	1938.91	0.906081	17.9473	2533.8	553.343	73059.9	106404	8640.72	25718.5	2113.92	339.972	799.277	58.1617	181.438	22.1234	38.952	3.43564	17.7737	1.99896	2106.85	84.4149	0.965043	0.315439	0.456123	0.0367774	0.105717	0.00863022	0.00133353	0.00305526	0.000219529	0.000668022	8.0467e-05	0.000140823	1.22003e-05	6.20156e-05	6.85515e-06	0.00545	0.000212859	0.0409565	0.0172799	0.00373125	0.0765877	0.0228159	0.427121	1.04834
v-1-27(core)	11.5422	31.2331	9.68251	0.662852	1916.68	0.914587	17.7781	1976.99	575.988	72459.1	108750	8949.52	26785.9	2260.92	352.172	846.403	61.6277	193.335	23.0569	41.2481	3.92392	17.4443	2.0141	2057.25	94.513	0.971475	0.313814	0.467624	0.0382099	0.110446	0.00925895	0.00138566	0.00324543	0.000233332	0.000714032	8.41224e-05	0.000149586	1.39775e-05	6.10549e-05	6.92847e-06	0.0053382	0.000239061	0.0492637	0.0135243	0.00389599	0.0775464	0.0226242	0.404947	1.06113
v-1-28(core)	12.2517	30.7042	10.0056	0.552489	1591.58	0.858425	16.8614	1848.31	384.4	75196	111242	9131.45	26231.9	2077.79	343.433	844.456	52.6429	146.413	15.7562	26.8523	2.73252	11.8059	1.59438	1872.79	26.3574	1.00531	0.326129	0.479014	0.0390418	0.108314	0.00852104	0.00135319	0.00324255	0.000199596	0.000541504	5.75672e-05	9.75174e-05	9.74731e-06	4.13791e-05	5.4924e-06	0.00486641	6.67629e-05	0.0411195	0.012662	0.00260377	0.0728875	0.0188134	0.415469	0.976984
v-1-29(core)	11.6462	31.1272	9.5826	0.545401	1712.91	0.992556	17.7014	1890.66	359.274	74472.3	110824	8940.92	25697.3	1986.1	316.44	784.43	45.9533	127.588	13.8287	25.3619	2.88532	17.8698	2.41177	1421.7	47.9248	0.962854	0.323005	0.477238	0.0382289	0.106112	0.00814542	0.00124689	0.00301219	0.00017424	0.000471902	5.05272e-05	9.2109e-05	1.02928e-05	6.26354e-05	8.30859e-06	0.00369443	0.000121398	0.0405937	0.0129527	0.00243369	0.0842802	0.0202485	0.414118	1.04777
v-1-30(core)	11.322	30.9825	9.49871	0.673593	1603.82	0.813209	17.4407	1584.41	455.758	77279.9	113295	9158.07	25456.7	1988.64	325.095	790.679	51.4044	157.101	18.5099	34.7015	3.74557	22.2695	2.71535	1684.3	35.6484	0.962526	0.338027	0.492018	0.0394897	0.106011	0.00822505	0.00129187	0.00306196	0.000196563	0.000585991	6.82054e-05	0.000127098	1.3475e-05	7.87195e-05	9.43381e-06	0.00441398	9.10674e-05	0.0505605	0.0109467	0.00311346	0.0696374	0.0191199	0.363484	1.0891
v-1-01(rim)	17.1737	35.5452	16.9034	0.186284	1035.01	0.469816	16.0879	8016.79	1003.14	30604.5	43420.2	3851.34	12303	1461.88	355.384	828.02	74.8213	265.552	35.8629	67.013	7.46332	55.0869	9.43982	4658.68	1002.9	1.49117	0.11654	0.16416	0.0144576	0.0446029	0.00526379	0.00122945	0.00279155	0.000249076	0.000862315	0.000115044	0.000213675	2.33749e-05	0.000169521	2.85515e-05	0.0106287	0.00223041	0.0121729	0.0482194	0.00596589	0.0350246	0.0107418	0.679718	0.48677
v-1-02(rim)	14.4249	33.8375	14.3602	0.400822	1079.12	0.549938	17.6407	4805.36	831.213	45700.4	64543.9	5651.81	17589.7	1940.82	362.364	918.146	68.8134	223.504	28.7467	55.3725	6.55022	41.9689	5.70137	7834.8	274.265	1.32902	0.182569	0.256005	0.0222582	0.0669	0.00733145	0.00131515	0.00324739	0.000240324	0.00076141	9.67444e-05	0.000185228	2.15224e-05	0.000135494	1.8091e-05	0.0187526	0.000639905	0.0274782	0.0303225	0.00518614	0.0430108	0.0117496	0.647353	0.694528
v-1-03(rim)	15.8145	33.3174	13.3637	0.42651	669.348	0.502533	15.5692	11768.9	360.428	54861.4	74267.2	6227.41	18025.7	1592.35	242.052	617.693	40.5309	118.189	13.5463	25.0326	2.36614	14.9005	1.77716	1972.27	56.645	1.24461	0.220551	0.296433	0.02468	0.0689915	0.0060531	0.000884045	0.00219852	0.000142445	0.000405177	4.58768e-05	8.42664e-05	7.82369e-06	4.84093e-05	5.67475e-06	0.00475046	0.000132997	0.029424	0.0747324	0.002263	0.0395515	0.00733397	0.538997	0.652798
v-1-04(rim)	13.5208	33.5094	12.9267	0.586345	885.923	0.462539	17.4252	4456.43	299.132	59215.4	80096.5	6671.43	19057.8	1484.33	214.758	512.824	32.6493	93.2708	10.6065	20.7865	2.12613	13.2896	1.8696	2446.13	100.101	1.22259	0.241748	0.32466	0.02685	0.0740736	0.00573004	0.000796528	0.00185358	0.000116525	0.000324715	3.6478e-05	7.10588e-05	7.13914e-06	4.38457e-05	6.06255e-06	0.00598322	0.000238675	0.0410782	0.0287374	0.00190729	0.0369687	0.00985756	0.506969	0.847595
v-1-05(rim)	13.9274	30.9083	16.499	0.439468	900.098	0.423082	15.9669	6647.78	474.781	49759	66569.7	5487.95	15845.2	1363.91	231.576	550.102	38.2495	122.38	16.2423	32.3424	3.65984	24.3729	3.29634	3280.75	176.264	1.57597	0.205163	0.272515	0.0223065	0.0621996	0.00531754	0.000867448	0.0020081	0.00013787	0.000430294	5.64163e-05	0.000111662	1.24113e-05	8.12119e-05	1.07953e-05	0.0081045	0.000424452	0.0310945	0.0432947	0.00305734	0.0341513	0.0101149	1.00666	0.246886
v-1-06(rim)	15.8965	33.3248	14.4324	0.452323	783.375	0.467775	16.2184	5754.96	335.201	51604.6	71162.5	5935.45	16240.9	1160.85	178.029	416.37	28.926	92.4577	12.0425	24.7307	2.8333	18.8552	2.5065	2117.42	103.88	1.32999	0.205275	0.281051	0.0232753	0.0615062	0.00436639	0.000643371	0.00146636	0.000100589	0.00031363	4.03547e-05	8.23739e-05	9.26974e-06	6.06129e-05	7.91938e-06	0.00504639	0.000241332	0.0308763	0.0361594	0.00208246	0.0364284	0.008493	0.61032	0.618097
v-1-07(rim)	14.3362	33.3823	13.4768	0.435925	1144.47	0.759018	17.525	3401.65	897.026	48080.7	70546.6	6046.13	18569.5	2051.53	378.889	983.08	74.1264	247.384	31.8266	62.8846	7.51797	49.4489	6.80404	9264.98	236.779	1.2611	0.19421	0.28292	0.0240754	0.0714106	0.0078357	0.00139039	0.00351565	0.000261753	0.000852118	0.000108298	0.000212693	2.49764e-05	0.000161415	2.18296e-05	0.0224219	0.000558576	0.0302164	0.0217032	0.00565889	0.0600219	0.0125994	0.586569	0.761307
v-1-08(rim)	17.0932	35.7133	16.1748	0.199653	983.27	0.491804	16.9484	8133	722.715	30281.8	44280.8	3846.47	12039.9	1340.92	311.797	684.825	56.9395	200.883	25.5154	46.8417	5.47067	38.726	6.43796	3311.48	598.969	1.42672	0.115297	0.167394	0.0144376	0.0436438	0.00482769	0.00107853	0.00230852	0.000189526	0.000652241	8.18409e-05	0.00014934	1.71319e-05	0.000119159	1.94699e-05	0.00755416	0.00133193	0.013045	0.0489126	0.00429764	0.0366595	0.0102036	0.669445	0.559293
v-1-09(rim)	15.9796	34.2074	15.2144	0.306841	984.664	0.430981	17.8777	7459.2	573.931	38253.4	54817.7	4657.07	14227.8	1400.69	305.949	628.245	47.574	163.608	20.137	39.1021	4.31872	28.8185	4.14087	4780.43	431.311	1.37327	0.149042	0.212053	0.0178873	0.0527763	0.00516033	0.00108295	0.00216711	0.000162041	0.000543589	6.60942e-05	0.000127569	1.38395e-05	9.07391e-05	1.28146e-05	0.0111592	0.000981446	0.0205155	0.0459052	0.00349238	0.032874	0.0104561	0.754577	0.57172
v-1-10(rim)	13.2456	32.9775	12.9849	0.523989	1077.72	0.454273	19.0471	3468.65	463.857	52582.9	76222.4	6350.62	18942.9	1720.86	271.957	677.924	43.7805	136.414	17.023	32.016	3.57447	21.7919	2.54581	6341.36	117.807	1.22651	0.214394	0.308559	0.0255259	0.0735321	0.00663454	0.00100738	0.00244718	0.000156051	0.000474302	5.84705e-05	0.000109306	1.19869e-05	7.18043e-05	8.24464e-06	0.0154909	0.000280529	0.0366624	0.0223389	0.00295378	0.0362612	0.0119762	0.669847	0.808886
v-1-11(rim)	12.8087	32.2849	12.4819	0.563288	1112.78	0.459145	19.6296	3321.06	449.431	55825.7	80510.1	6673.46	19853.3	1760.66	272.605	661.305	43.1477	128.277	15.5048	30.6798	3.35005	21.2997	2.35026	6277.21	107.521	1.19052	0.229841	0.329101	0.0270856	0.0778191	0.00685435	0.00101965	0.00241051	0.000155298	0.000450368	5.37762e-05	0.000105767	1.13441e-05	7.08685e-05	7.68571e-06	0.0154841	0.000258537	0.0397972	0.0215974	0.00288988	0.0370082	0.0124866	0.725172	0.813678
v-1-12(rim)	11.3336	31.2833	11.8582	0.679446	943.372	0.468711	19.514	4655.18	113.401	70349.3	93321	7622.99	21896.9	1606.6	237.373	465.098	23.368	51.8306	4.92356	8.64404	0.710929	4.57626	0.603353	1667.65	83.7851	1.1606	0.297207	0.391441	0.0317484	0.0880734	0.00641808	0.000911077	0.00173964	8.63058e-05	0.00018673	1.75231e-05	3.0579e-05	2.47033e-06	1.56242e-05	2.02464e-06	0.00422116	0.000206731	0.0492589	0.0310648	0.000748241	0.038767	0.0108625	0.765978	0.803802
v-1-13(rim)	18.4316	36.4004	17.9662	0.124749	962.736	0.347816	16.5889	8859.43	890.522	22314.6	31368.5	2578.54	7559.17	748.392	225.481	395.41	37.9024	170.585	27.4244	62.2591	7.61075	57.9473	9.6818	2775.65	904.068	1.5431	0.0827303	0.115466	0.00942422	0.0266816	0.00262363	0.000759467	0.00129789	0.000122846	0.000539315	8.56532e-05	0.000193279	2.32076e-05	0.000173618	2.85107e-05	0.00616547	0.00195756	0.00793673	0.0518816	0.00515638	0.0252453	0.00972808	0.751892	0.419185
v-1-14(rim)	13.1653	32.6033	13.4982	0.519872	1101.08	0.453643	18.398	4287.41	532.303	56478.5	75472.5	6324.08	18611.6	1662.67	288.258	692.853	47.9396	149.398	18.1972	34.5047	3.66104	21.3168	2.52464	8362.57	133.57	1.27877	0.230959	0.306427	0.0254943	0.0724597	0.00642914	0.00107092	0.00250846	0.000171381	0.000520983	6.26881e-05	0.000118151	1.23136e-05	7.04463e-05	8.20024e-06	0.0204888	0.000319006	0.0364819	0.0276935	0.00339965	0.036318	0.012272	0.707654	0.72491
v-1-15(rim)	19.2876	37.0776	18.8322	0.0943473	931.477	0.396602	16.0498	9971.23	736.161	16381.8	24176.4	2034.18	5993.31	696.87	193.527	365.045	35.3576	149.65	22.9661	48.8774	5.61376	36.8359	6.48945	1420.33	745.149	1.59221	0.0597858	0.0876019	0.00731847	0.020824	0.00240483	0.000641653	0.0011795	0.000112807	0.000465735	7.06079e-05	0.000149365	1.68507e-05	0.000108641	1.88113e-05	0.00310565	0.00158824	0.00590873	0.0574799	0.00419598	0.0283365	0.00926514	0.756742	0.358571
v-1-16(rim)	15.4382	34.0157	14.7147	0.356074	1045.04	0.484352	17.7627	5791.85	667.843	41811.7	60784.1	5129.5	15737.1	1510.29	286.472	676.406	51.2609	175.531	23.301	45.9249	4.80755	33.3108	4.9597	4956.63	432.569	1.34234	0.164644	0.237642	0.0199121	0.0589973	0.00562345	0.00102483	0.00235814	0.000176462	0.000589423	7.72951e-05	0.000151426	1.55704e-05	0.000106003	1.55124e-05	0.0116939	0.000994809	0.0240612	0.0360244	0.0041072	0.0373391	0.0112157	0.69457	0.637258
v-1-17(rim)	16.1083	34.2091	15.2179	0.316461	993.944	0.454329	16.9213	7211.86	607.64	40827.1	58576.4	4926.11	14911.8	1404.25	270.439	626.834	47.1369	160.558	21.0034	40.0581	4.9687	31.9369	4.91015	4421.33	340.634	1.37852	0.15964	0.227407	0.0189887	0.0555122	0.00519204	0.000960698	0.00217001	0.000161129	0.000535369	6.91854e-05	0.000131157	1.59796e-05	0.000100919	1.52499e-05	0.010358	0.000777894	0.0212346	0.0445425	0.00371078	0.0347794	0.0105926	0.681776	0.578077
v-1-18(rim)	16.0829	34.6197	15.1668	0.335047	987.283	0.436933	16.7899	6625.05	575.817	40675.6	57926.5	4884.86	14792.2	1339.56	261.648	574.557	42.5368	140.282	19.5948	38.0162	4.61253	30.0876	4.65618	4325.76	319.583	1.37202	0.158831	0.224577	0.0188039	0.0549914	0.00494608	0.0009282	0.00198632	0.000145206	0.000467122	6.44576e-05	0.000124301	1.48139e-05	9.49455e-05	1.44413e-05	0.0101202	0.000728825	0.022451	0.0408623	0.00351165	0.033402	0.0105072	0.621749	0.626618
v-1-19(rim)	16.7099	34.9866	15.8586	0.239389	894.595	0.411132	16.5894	8785.9	572.266	36637.6	51563.5	4267.99	12954.7	1187.66	246.693	544.71	42.9403	146.214	19.162	39.5565	4.65108	31.526	5.0719	3923.74	349.347	1.41693	0.141301	0.197446	0.016227	0.0475672	0.0043312	0.000864368	0.00185994	0.000144777	0.000480876	6.22571e-05	0.000127745	1.47537e-05	9.82594e-05	1.55369e-05	0.00906661	0.000786888	0.0158435	0.0535225	0.00344699	0.0310424	0.00940349	0.672818	0.545441
v-1-20(rim)	13.5342	32.55	13.0533	0.523986	1158.28	0.510579	18.0929	4285.48	483.313	57187.2	78872.1	6437.68	19136.1	1579.96	280.214	655.058	45.6622	138.513	17.2316	33.46	3.72791	21.7602	2.88139	6010	141.654	1.23842	0.234198	0.320697	0.0259903	0.0746105	0.00611827	0.00104256	0.00237509	0.000163478	0.000483729	5.94486e-05	0.000114741	1.25568e-05	7.2017e-05	9.3727e-06	0.0147464	0.000338807	0.0368244	0.0277215	0.00309128	0.040936	0.0129284	0.656195	0.754674
v-1-21(rim)	15.4306	33.195	14.4861	0.361985	1018.7	0.503522	17.0956	5950.33	621.607	47519.5	66914.5	5527.42	16982.6	1569.42	305.596	694.607	53.8402	171.483	22.0189	42.4989	4.96372	28.9315	4.43559	6123.04	270.766	1.33613	0.189193	0.264509	0.0216946	0.0643724	0.0059084	0.00110536	0.00244843	0.000187395	0.000582214	7.38517e-05	0.000141683	1.62543e-05	9.30873e-05	1.40269e-05	0.0146059	0.000629601	0.0247317	0.0374202	0.00386522	0.0392472	0.0110542	0.694665	0.601346
v-1-22(rim)	17.3655	35.3806	16.247	0.203647	1016.35	0.489738	16.6894	8096.57	692.362	31413.2	45772.2	3841.7	11689.3	1216.53	280.16	574.175	48.3818	176.902	23.7683	46.8863	5.21248	35.5287	5.88691	3217.88	638.705	1.43408	0.119687	0.173151	0.0144296	0.0424019	0.00438286	0.000969764	0.00193685	0.000161152	0.000574773	7.62895e-05	0.000149585	1.63346e-05	0.000109396	1.78156e-05	0.0073457	0.00142126	0.0133151	0.048727	0.00411997	0.0365306	0.0105542	0.684967	0.525824
v-1-23(rim)	14.6604	33.8093	13.6418	0.348352	994.534	0.502004	17.3946	4645.13	449.886	52840.7	72592.6	5592.24	15653.9	1220.1	213.903	514.141	34.4599	116.178	14.8112	31.1144	3.65508	25.1389	4.13052	3591.81	280.199	1.26831	0.21206	0.289247	0.0221244	0.0598102	0.00463001	0.000779883	0.00182678	0.000120899	0.000397596	5.00738e-05	0.000104558	1.20647e-05	8.15309e-05	1.31665e-05	0.00863636	0.000656742	0.0239904	0.0294456	0.0028198	0.0394415	0.0108781	0.570734	0.758485
v-1-24(rim)	11.7756	31.1059	10.0211	0.765866	1949.81	0.93092	17.7765	1916.77	599.752	69083.6	106597	9053.87	27621.7	2402.92	395.504	921.493	67.8145	208.197	24.6558	41.9757	4.01325	20.3837	2.54727	1783.51	125.42	1.00063	0.297761	0.45617	0.03847	0.113346	0.00979331	0.0015487	0.00351641	0.000255525	0.000765234	8.95247e-05	0.000151495	1.42271e-05	7.10008e-05	8.72056e-06	0.00460569	0.000315716	0.0566468	0.0130495	0.00403729	0.0785528	0.022905	0.447541	1.01138
v-1-25(rim)	12.0632	31.2228	9.57065	0.497802	1917.82	0.966027	17.5937	1578.53	469.214	71581.2	110060	9135.03	27386.8	2309.77	361.91	839.615	59.0064	174.487	19.5347	32.4189	3.01962	13.6115	1.49988	1280.63	50.6761	0.95717	0.309018	0.471738	0.0388767	0.112561	0.00942867	0.00141941	0.00320907	0.00022269	0.000642353	7.1043e-05	0.00011719	1.07217e-05	4.74872e-05	5.143e-06	0.00331234	0.000127769	0.0368782	0.0107639	0.00316359	0.0816451	0.0225651	0.394792	1.05143
v-1-26(rim)	18.1975	36.9713	17.4103	0.135196	910.978	0.337001	15.4016	8084.93	764.122	24784.3	35744.2	3041.94	9090.03	897.194	248.897	463.786	38.9586	155.813	23.5226	51.6859	6.63566	46.9458	7.47713	1901.83	570.173	1.51094	0.092844	0.132944	0.0112337	0.0324194	0.00317806	0.000847074	0.00153819	0.000127585	0.000497747	7.42324e-05	0.000162127	2.04452e-05	0.000142122	2.22479e-05	0.00426852	0.00124745	0.00869104	0.0478395	0.0044706	0.0247153	0.00930102	0.559721	0.538872
v-1-27(rim)	16.3761	33.6929	15.8403	0.304963	1032.72	0.408135	16.71	9059.88	638.048	41187.5	55926.7	4725.91	14191.3	1398.67	302.899	697.41	50.9112	175.915	22.2523	44.5535	5.01813	36.4874	5.66652	4691.96	477.787	1.43134	0.160649	0.216581	0.0181717	0.0526984	0.00515852	0.00107333	0.00240834	0.000173598	0.000585119	7.3117e-05	0.000145513	1.60984e-05	0.000115012	1.75552e-05	0.0109646	0.00108839	0.0204122	0.0558172	0.0038868	0.0311655	0.0109785	0.788061	0.452965
v-1-28(rim)	17.013	34.7899	16.1364	0.221809	909.829	0.401563	16.3804	7220.05	670.788	35258.9	52375	4503.19	13978.9	1447.51	326.221	717.315	54.3687	182.805	23.9755	44.0714	5.25237	32.8668	5.31363	3344.23	350.824	1.43878	0.135704	0.20014	0.0170859	0.0512222	0.00526795	0.00114067	0.00244426	0.000182932	0.000599984	7.7736e-05	0.000142032	1.66267e-05	0.000102227	1.62439e-05	0.00771163	0.000788588	0.0146498	0.0438931	0.00403212	0.0302575	0.00954394	0.68293	0.517508
v-2-01(core)	12.458	31.0199	9.59152	1.90265	2299.37	1.54559	21.1757	1241.48	878.785	72943.4	113642	10003.9	29343.8	2756.44	417.185	1217.54	89.8604	280.691	34.0518	68.6429	6.81708	38.5172	5.22424	1490.29	67.9051	0.90083	0.295718	0.457422	0.0399813	0.113258	0.0105667	0.00153654	0.00437008	0.000318477	0.000970393	0.000116296	0.00023302	2.2731e-05	0.000126192	1.68226e-05	0.00361983	0.00016078	0.132367	0.00794992	0.00556415	0.122671	0.0254065	0.672238	0.962403
v-2-02(core)	8.151	30.432	10.1762	1.7415	2150.57	1.4633	20.6776	1936.26	945.994	67472.6	107539	9698.26	29795.2	3104.56	502.306	1447.72	113.402	344.676	37.8268	66.5877	5.8805	31.2398	4.26017	1178.81	77.5744	1.0294	0.294621	0.46622	0.0417471	0.123864	0.0128184	0.00199264	0.00559676	0.000432889	0.00128344	0.000139145	0.000243465	2.11193e-05	0.000110238	1.47755e-05	0.00308394	0.00019783	0.130494	0.0133547	0.00645134	0.125091	0.0255938	0.738614	0.980594
v-2-03(core)	7.498	30.0313	9.19446	2.10959	2208.97	1.64496	20.1775	1063.09	1136.84	65982.8	111606	10303	31753.8	3307.04	512.22	1474.9	113.66	359.497	44.4784	93.6402	10.4017	67.7375	10.5806	1878.07	127.574	0.953236	0.295285	0.49589	0.045454	0.135291	0.0139942	0.00208253	0.00584373	0.00044467	0.00137194	0.000167684	0.000350897	3.82862e-05	0.000244978	3.76095e-05	0.00503558	0.000333436	0.162009	0.00751471	0.00794577	0.144119	0.026943	0.601813	1.11756
v-2-04(core)	7.69	30.4523	9.98365	1.82107	2236.5	1.59746	21.4237	3057	1115.09	72401.3	105391	9009.45	26062.1	2518.01	402.166	1185.11	97.5729	328.042	43.0614	90.862	9.76625	57.7855	8.22213	2291.55	87.5687	1.00867	0.315748	0.456338	0.0387337	0.10821	0.0103837	0.00159339	0.00457582	0.000371999	0.00121997	0.000158203	0.000331805	3.50308e-05	0.000203657	2.8481e-05	0.00598756	0.000223039	0.136286	0.0210583	0.00759504	0.136389	0.0265833	0.797391	0.981628
v-2-05(core)	7.759	30.2418	9.57607	1.90734	2347.22	1.48923	20.5969	1110.76	819.739	74424.4	114771	10062.6	29766.2	2703	403.223	1163.5	84.8419	258.115	32.2098	64.6404	6.48912	40.3078	5.24506	1570.75	59.3265	0.976261	0.327515	0.501457	0.0436538	0.12471	0.0112476	0.00161207	0.00453311	0.000326395	0.000968627	0.000119408	0.000238191	2.34871e-05	0.000143348	1.83334e-05	0.00414142	0.000152476	0.144037	0.00772093	0.00563399	0.128302	0.0281523	0.664947	1.06093
v-2-06(core)	11.127	31.7247	11.294	0.907411	1658.6	0.881757	18.9301	3044.61	799.29	64821.4	101353	9110.43	26235.8	2408.73	401.737	1029.92	77.1618	248.835	31.9326	68.4895	8.1374	52.8225	7.59719	1312.65	48.0096	1.10406	0.273526	0.424623	0.0378979	0.105399	0.00961093	0.00154009	0.00384768	0.000284643	0.000895404	0.000113513	0.000241997	2.82419e-05	0.00018013	2.5463e-05	0.0033186	0.000118317	0.0657073	0.0202929	0.00526755	0.0728426	0.019075	0.618817	0.902168
v-2-07(core)	9.52	31.8264	10.8037	1.65972	1705.7	1.46662	20.1598	2001.9	661.1	69726.4	110782	10059.5	30710.5	2836.14	439.449	1176.71	80.6555	227.856	25.5989	49.2176	4.65647	28.4819	3.92748	1608.89	102.069	1.04872	0.292162	0.460875	0.0415524	0.122511	0.011237	0.00167286	0.00436526	0.000295446	0.000814169	9.03604e-05	0.000172685	1.60476e-05	9.64453e-05	1.30713e-05	0.00403906	0.000249781	0.119341	0.0132496	0.00432632	0.120309	0.0194793	0.641524	0.966912
v-2-08(core)	10.4205	31.1619	9.81911	1.28685	1790.86	1.57846	18.1868	2067.08	565.552	66866.5	106988	9030.11	28447.7	2630.36	434.26	1080.39	76.4833	217.889	22.1875	34.9312	3.34664	19.3962	2.7923	922.304	69.087	0.987037	0.290139	0.460915	0.0386266	0.117519	0.0107922	0.00171187	0.00415043	0.000290123	0.00080623	8.11028e-05	0.000126916	1.19436e-05	6.80142e-05	9.62356e-06	0.00239772	0.000175078	0.0958202	0.0141673	0.00383261	0.134087	0.021179	0.472539	1.03007
v-2-09(core)	9.48025	30.4413	9.17209	1.3446	1742.85	1.49044	20.173	2275.89	544.498	74232.9	105807	8490.65	25100.3	2029.03	307.237	741.711	51.5866	161.522	20.6559	39.5211	4.63798	30.3241	4.39409	1163.54	56.3919	0.931196	0.325316	0.460373	0.0366814	0.104725	0.00840803	0.00122322	0.00287779	0.000197635	0.000603627	7.62576e-05	0.000145026	1.67173e-05	0.000107395	1.52952e-05	0.00305505	0.000144332	0.101119	0.015754	0.00372675	0.127874	0.0208167	0.629669	1.05367
v-2-10(core)	9.17186	30.1615	9.40406	1.41462	1810.88	1.50798	20.2762	2472.09	535.479	75020.5	105824	8448.08	25008.6	2185.55	356.727	827.938	56.7898	172.109	20.206	37.6431	4.20824	26.3351	3.96972	1561.21	68.5746	0.956956	0.329529	0.461513	0.036582	0.104584	0.00907762	0.00142355	0.00321978	0.000218073	0.00064468	7.47696e-05	0.000138454	1.52034e-05	9.34833e-05	1.385e-05	0.00410868	0.00017592	0.106631	0.0171518	0.00367351	0.129678	0.0216794	0.686938	1.00893
v-2-11(core)	8.91194	30.1132	9.25986	1.51075	1938.48	1.30562	20.2532	1402.9	454.667	77420.8	110570	8699.43	24709.1	1961.27	304.69	722.88	49.0759	146.617	17.1892	31.5063	3.13571	18.3368	2.36214	756.363	42.7205	0.947256	0.341867	0.484758	0.0378692	0.103877	0.00818908	0.00122231	0.00282606	0.000189446	0.000552093	6.39421e-05	0.000116494	1.13884e-05	6.54349e-05	8.2848e-06	0.00200104	0.000110173	0.114478	0.00978497	0.00313558	0.112868	0.0233295	0.635979	1.06691
v-2-12(core)	9.51857	30.3185	8.8632	1.41014	1921.93	1.46105	20.6947	1178.66	502.071	71712.2	107250	8680.62	25356.6	2047.46	321.13	757.836	52.5143	160.21	19.2397	35.1973	3.80403	22.1622	2.88828	854.131	60.7149	0.900105	0.314363	0.466793	0.0375133	0.105826	0.00848695	0.00127892	0.00294123	0.000201249	0.000598904	7.10508e-05	0.000129198	1.37155e-05	7.85122e-05	1.00567e-05	0.00224331	0.000155443	0.106079	0.00816131	0.00343739	0.125389	0.0229627	0.632172	1.09522
v-2-13(core)	8.89549	29.9561	8.95042	1.74976	2006.24	1.55455	20.9487	1168.39	545.819	73507.8	107576	8649.98	24841.1	1969.05	308.899	735.553	51.5684	159.664	19.9268	39.0071	4.31461	27.3089	3.92783	1030.08	72.3657	0.913381	0.323801	0.470488	0.0375626	0.104179	0.00820162	0.00123619	0.00286863	0.000198585	0.000599761	7.3946e-05	0.000143878	1.5632e-05	9.72155e-05	1.37428e-05	0.00271857	0.000186173	0.132268	0.00812952	0.00375508	0.134062	0.0240864	0.678705	1.07838
v-2-14(core)	9.03675	29.9312	8.93435	1.71199	1991.49	1.53461	20.8275	1184.92	545.712	72709.8	108408	8745.33	25216.7	2009.52	314.202	738.872	52.3068	166.013	20.9684	39.2803	4.46512	26.7069	3.83872	1010.14	71.898	0.911706	0.320273	0.474108	0.0379752	0.105749	0.00836985	0.00125736	0.00288146	0.000201421	0.000623587	7.78081e-05	0.000144881	1.61767e-05	9.50689e-05	1.34305e-05	0.00266585	0.000184962	0.129408	0.0082442	0.00375419	0.132337	0.0239084	0.670827	1.07603
v-2-15(core)	9.14845	29.9189	9.1114	1.59825	1953.8	1.49208	20.5626	1272.18	544.678	73286.1	108804	8841.94	25642.5	2083.77	322.864	765.871	53.8099	168.215	20.6788	39.2535	4.26105	25.7347	3.48147	817.87	62.7897	0.929504	0.322719	0.4757	0.0383837	0.107504	0.00867663	0.00129166	0.00298589	0.000207149	0.000631677	7.67113e-05	0.00014474	1.54329e-05	9.15817e-05	1.21771e-05	0.00215782	0.000161484	0.120775	0.00884877	0.003746	0.128633	0.0234492	0.674686	1.04946
v-2-16(core)	11.2277	31.1329	9.78684	0.887683	1174.89	1.09323	18.0535	4296.15	695.397	72575.5	103237	8041.98	23684.3	1977.16	308.35	830.476	62.1544	204.184	25.9338	45.1257	4.29045	19.0543	2.18378	2662.67	138.996	0.983611	0.314853	0.44467	0.0343935	0.0978229	0.00811066	0.0012153	0.00318977	0.000235726	0.000755383	9.47795e-05	0.000163926	1.53091e-05	6.68033e-05	7.52493e-06	0.00692089	0.000352175	0.0660853	0.0294394	0.00471167	0.0928508	0.0138919	0.475614	1.01571
v-2-17(core)	11.2275	31.1861	9.84425	0.822571	1171.7	1.06668	18.3229	4375.4	602.771	73468.9	102227	7854.5	22691.9	1806.88	289.062	735.638	55.7534	179.834	22.6905	40.4256	3.97344	18.197	2.0958	2625.14	113.8	0.98701	0.317964	0.439266	0.0335112	0.0934992	0.00739438	0.00113655	0.00281874	0.000210943	0.000663702	8.27277e-05	0.0001465	1.41439e-05	6.36447e-05	7.20447e-06	0.00680698	0.000287644	0.0610911	0.0299106	0.00407429	0.0903784	0.0138209	0.503415	1.00653
v-2-18(core)	10.9676	30.9715	9.64383	0.937648	1305.48	1.40692	18.2449	3346.48	513.842	73410.2	105100	8418.93	24689.5	2052.26	330.699	753.373	52.6007	161.038	19.7078	35.5959	3.69424	22.2972	2.84462	1069.19	88.6472	0.970219	0.318796	0.453155	0.036042	0.102078	0.00842725	0.00130471	0.00289656	0.000199695	0.000596367	7.20985e-05	0.000129438	1.3195e-05	7.82518e-05	9.81202e-06	0.00278189	0.000224833	0.0698758	0.022955	0.00348507	0.119614	0.0154516	0.506673	1.00198
v-2-19(core)	10.8614	30.5842	9.98414	1.03694	1369.97	1.29833	18.0191	1788.24	346.719	73126.6	108944	8847.26	26211.2	2107.76	329.47	792.25	49.9153	139.131	14.0489	20.1405	1.48421	6.1242	0.705242	610.152	52.3051	1.00772	0.318597	0.471255	0.0379989	0.108721	0.00868331	0.00130408	0.00305593	0.000190115	0.000516913	5.15629e-05	7.34755e-05	5.31849e-06	2.15626e-05	2.44051e-06	0.00159269	0.000133091	0.0775262	0.0123062	0.00235922	0.110741	0.0162675	0.522321	0.97251
v-2-20(core)	10.7396	30.575	10.3463	1.28229	1494.63	1.25587	18.2564	3047.07	680.328	71227.6	104559	8313.36	23868.9	1945.97	314.342	781.259	58.7426	194.37	24.2285	45.5365	4.83378	29.3842	4.14315	1670.95	93.8215	1.0402	0.309113	0.450523	0.0355665	0.0986198	0.0079855	0.00123935	0.00300178	0.000222864	0.000719327	8.8578e-05	0.000165476	1.72538e-05	0.000103055	1.42816e-05	0.0043447	0.000237799	0.0954957	0.0208873	0.00461118	0.106702	0.0176785	0.573588	0.935018
v-2-21(core)	10.547	30.6599	10.0433	1.21203	1483.9	1.4269	18.3519	4569.02	901.188	72883.7	102341	7870.83	22304.3	1756.58	290.862	709.803	56.89	213.73	30.8234	66.7027	8.23712	53.4044	7.41521	2565.76	121.152	1.01291	0.317294	0.442351	0.0337791	0.0924445	0.00723096	0.00115038	0.0027358	0.000216514	0.000793459	0.000113043	0.000243154	2.94941e-05	0.000187886	2.56408e-05	0.00669229	0.000308034	0.090547	0.0314186	0.00612733	0.121613	0.0176069	0.579502	0.941758
v-2-22(core)	11.3323	30.3055	10.0223	0.991005	1155.26	1.37264	17.6361	2168.6	618.532	67227	106515	8956.3	27619.8	2452.61	401.841	995.392	71.774	216.298	23.4258	37.9342	3.15289	13.8373	1.49818	1709.63	133.48	1.01394	0.293579	0.461827	0.0385572	0.114832	0.0101276	0.00159426	0.00384849	0.00027401	0.000805494	8.618e-05	0.000138714	1.13245e-05	4.88338e-05	5.19665e-06	0.00447312	0.000340437	0.0742656	0.0149587	0.0042186	0.117353	0.0137502	0.532896	0.933582
v-2-23(core)	11.1508	30.932	10.1349	0.645544	841.753	0.590726	19.2195	1540.55	349.399	69914.9	107094	8757.79	26712	2146.75	279.247	773.899	48.0203	128.227	13.5453	24.5081	2.693	17.7593	2.49438	1784.88	42.7816	1.01422	0.302008	0.459302	0.037294	0.109854	0.00876852	0.00109587	0.0029597	0.000181339	0.000472339	4.9291e-05	8.86472e-05	9.56782e-06	6.19956e-05	8.55829e-06	0.00461938	0.00010793	0.0478524	0.0105113	0.00235719	0.0499564	0.00991009	0.568739	1.01208
v-2-24(core)	11.3445	30.8359	10.3777	1.01544	1273.03	1.10546	18.326	4330.54	569.924	69357.4	99107.7	7874.41	23129.5	1875.6	306.657	766.989	56.2749	174.276	20.8211	36.2474	3.32636	16.0835	1.86786	2265.08	155.35	1.0377	0.299363	0.424717	0.0335058	0.0950459	0.00765499	0.00120249	0.00293096	0.000212343	0.00064146	7.57077e-05	0.000131005	1.18087e-05	5.61014e-05	6.40364e-06	0.00585754	0.000391612	0.0752126	0.0295243	0.00384191	0.0934126	0.0149758	0.581995	0.924148
v-2-25(core)	11.4014	31.4273	9.9259	0.863478	1275.41	1.49104	17.9766	3458.84	458.588	73720	99018.4	7735.9	22429.1	1780.29	291.261	726.97	51.4359	156.514	17.4976	27.3241	2.24946	8.84745	0.905501	1928.35	128.329	0.990181	0.317443	0.423335	0.0328388	0.0919505	0.00724885	0.00113943	0.00277149	0.000193627	0.000574726	6.34732e-05	9.85223e-05	7.96686e-06	3.07883e-05	3.09704e-06	0.004975	0.000322733	0.0638061	0.0235258	0.0030841	0.125698	0.0149684	0.484049	0.989894
v-2-01(rim)	12.2127	31.9952	11.79	0.875685	1118.34	1.71088	18.186	3255.02	548.995	60573.6	89236.5	7259.85	21295.4	1892.89	288.963	730.312	49.8978	155.233	18.3889	35.1279	4.67762	33.2596	4.59493	1098.89	121.791	1.13853	0.252495	0.369317	0.0298327	0.0845118	0.00746091	0.0010943	0.00269521	0.000181831	0.0005518	6.45739e-05	0.000122611	1.6037e-05	0.00011204	1.52134e-05	0.00274442	0.000296497	0.0626393	0.0214316	0.00357407	0.13962	0.0127053	0.659666	0.783775
v-2-02(rim)	12.2482	31.9539	11.819	0.798653	1190.01	1.14517	18.3475	3097.15	435.759	61327.1	91763	7565.94	22325.8	1949.89	312.05	759.088	51.5742	148.454	16.316	28.824	3.04097	20.3025	2.53651	741.517	74.0386	1.144	0.256234	0.380662	0.0311633	0.0888082	0.00770357	0.00118449	0.00280797	0.00018838	0.000528938	5.74285e-05	0.000100843	1.04502e-05	6.85521e-05	8.4178e-06	0.00185623	0.000180668	0.0572628	0.0204399	0.00284351	0.0936721	0.0135512	0.636659	0.823006
v-2-03(rim)	12.1384	31.7981	11.9741	0.739845	1101.19	0.695279	19.238	3310.37	390.51	61320.8	91054.2	7408.78	21980.2	1842.07	282.236	681.478	44.9668	131.146	14.7729	26.4936	2.94214	18.7443	2.59234	991.605	46.6956	1.15725	0.255816	0.377143	0.0304693	0.0872999	0.00726647	0.00106968	0.00251702	0.000163994	0.000466556	5.19178e-05	9.2548e-05	1.00951e-05	6.31941e-05	8.58989e-06	0.00247848	0.000113771	0.0529652	0.0218136	0.00254435	0.0567852	0.0125207	0.707474	0.820697
v-2-04(rim)	12.4261	32.0293	12.4011	0.627007	1187.66	0.501464	19.809	3804.37	550.265	59612	81249.2	6691.14	20466.8	1909.46	319.772	800.909	54.1306	163.155	19.1261	33.882	3.54297	19.8903	2.4808	3925.91	121.74	1.18745	0.246391	0.333424	0.0272638	0.0805385	0.00746277	0.00120075	0.00293082	0.000195592	0.000575066	6.65959e-05	0.000117265	1.20444e-05	6.64384e-05	8.14439e-06	0.00972207	0.000293873	0.0444727	0.0248374	0.00355212	0.0405777	0.0133791	0.765547	0.793452
v-2-05(rim)	13.2854	32.2363	13.2338	0.577748	1182.69	0.528054	18.8959	4534.14	879.815	55371.7	77280.4	6404.49	19682.3	1954.44	344.979	937.524	74.7435	250.553	32.487	61.4662	6.47894	39.2124	4.35756	3168.86	119.36	1.25292	0.226289	0.313567	0.0258021	0.0765795	0.00755255	0.00128083	0.00339213	0.000267034	0.000873174	0.000111844	0.000210338	2.17774e-05	0.000129504	1.41447e-05	0.00775896	0.000284885	0.0405175	0.0292686	0.00561553	0.0422483	0.0131732	0.773541	0.696858
v-2-06(rim)	12.6003	31.9577	12.9749	0.604923	1174.82	0.482363	19.7771	4056	659.356	57907.7	78923.2	6513.39	19862.7	1882.35	324.429	836.601	60.7065	192.111	23.694	43.3935	4.69461	25.9867	3.0236	3413.11	124.376	1.23564	0.238047	0.32212	0.0263955	0.0777366	0.00731685	0.00121163	0.00304481	0.000218162	0.00067345	8.20533e-05	0.000149368	1.58728e-05	8.63305e-05	9.87252e-06	0.00840627	0.000298608	0.0426733	0.0263364	0.00423323	0.0388201	0.0131626	0.830206	0.717827
v-2-07(rim)	12.5245	31.8915	12.572	0.627003	1192.4	0.485883	20.0217	4049.07	509.705	60199	79081	6486.11	19613.1	1775.29	302.914	739.011	50.6511	153.165	17.8093	30.7768	3.17759	19.1148	2.26791	3732.88	112.639	1.20092	0.248219	0.323746	0.0263649	0.0769935	0.0069217	0.00113472	0.00269781	0.00018258	0.000538559	6.1862e-05	0.000106261	1.07764e-05	6.36945e-05	7.4276e-06	0.00922182	0.000271252	0.0443655	0.0263714	0.00328239	0.0392224	0.0134002	0.814515	0.757438
v-2-08(rim)	11.8132	31.4819	11.9945	0.763163	1033.19	0.785218	19.9741	3256.51	270.981	60700.3	86877.5	6979.12	20201.2	1530.86	175.669	457.62	25.9447	69.1717	8.36486	16.9007	2.28465	17.1875	2.33745	7231.9	81.2642	1.16145	0.253714	0.360535	0.0287574	0.080388	0.00605044	0.000667071	0.00169345	9.48023e-05	0.000246552	2.94538e-05	5.91514e-05	7.85418e-06	5.80565e-05	7.76018e-06	0.0181106	0.000198376	0.0547393	0.0214999	0.00176895	0.0642538	0.01177	0.786847	0.802838
v-2-09(rim)	17.4455	34.783	15.9694	0.358009	592.678	0.430041	16.0922	9013.78	257.649	35779.7	52354.1	4253.38	12480.2	975.983	134.071	313.537	20.1168	61.6369	8.38622	17.8871	2.30893	16.1937	2.23102	3742.87	54.0201	1.421	0.137429	0.199655	0.0161054	0.0456378	0.00354472	0.000467842	0.00106622	6.75491e-05	0.000201888	2.71356e-05	5.75293e-05	7.29425e-06	5.02662e-05	6.80649e-06	0.00861339	0.000121181	0.0235975	0.0546867	0.00154559	0.0323377	0.00620449	0.662941	0.513986
v-2-10(rim)	11.6191	31.5881	11.7615	0.772562	1176.66	0.64783	19.6977	3228.15	122.923	67532.2	89923.3	7059.46	20238.4	1342.07	165.375	367.362	19.2606	46.1559	4.68665	8.20601	0.721313	4.16364	0.575792	3649.42	38.1138	1.14394	0.283523	0.374832	0.0292176	0.0808939	0.00532783	0.000630768	0.00136548	7.06913e-05	0.000165247	1.65757e-05	2.8848e-05	2.49075e-06	1.41266e-05	1.92008e-06	0.0091797	9.3454e-05	0.0556597	0.0214074	0.000806	0.053247	0.013464	0.727779	0.846873
v-2-11(rim)	14.3381	31.4647	13.0808	0.520777	895.591	0.431842	17.9447	3255.28	457.089	55120.2	86001.8	7180.33	21384.9	1980.98	277.675	766.317	52.0963	150.511	17.3404	28.9952	3.18423	17.6158	2.33431	2177.86	111.854	1.2429	0.226073	0.350212	0.029032	0.0835039	0.00768272	0.00103466	0.00278266	0.000186794	0.000526422	5.99138e-05	9.95796e-05	1.07416e-05	5.83882e-05	7.60455e-06	0.00535172	0.000267934	0.0366538	0.0210891	0.00292794	0.0346752	0.0100113	0.738204	0.663206
v-2-12(rim)	13.1584	32.1671	11.5401	0.573537	929.8	0.530932	17.8376	2636.58	412.406	60247.5	94711.2	7962.91	23231.9	2026.96	282.982	758.833	52.3385	146.522	16.1694	25.9563	2.63676	14.664	2.00677	1825.68	89.535	1.11705	0.251732	0.392905	0.0327994	0.0924159	0.00800834	0.00107419	0.00280712	0.000191178	0.000522072	5.69147e-05	9.08131e-05	9.06144e-06	4.9515e-05	6.65999e-06	0.00457035	0.000218489	0.0411235	0.0174009	0.00269122	0.0434305	0.0105885	0.505853	0.913291
v-2-13(rim)	18.405	36.1051	18.0106	0.115547	698.507	0.407407	16.1143	9497.77	566.262	27508.1	37859.6	3350.97	9372.25	837.389	149.186	381.882	28.5172	103.807	16.3435	41.2829	5.11935	37.264	5.77942	1573.52	66.7847	1.54826	0.102073	0.139481	0.0122579	0.0331098	0.00293816	0.000502925	0.00125457	9.25072e-05	0.000328476	5.1089e-05	0.000128271	1.56241e-05	0.000111745	1.70338e-05	0.00349824	0.000144732	0.00735766	0.0556679	0.00328166	0.0295962	0.00706426	0.763859	0.374701
v-2-14(rim)	14.874	33.8666	14.2488	0.491453	1268.54	0.852124	19.5734	3969.74	1047.61	51946.6	73024.8	7002.72	22739.8	3003.2	493.086	1427.54	102.2	310.346	38.2228	77.1223	8.73741	56.9067	7.19404	6947.05	233.667	1.27038	0.199916	0.279027	0.0265676	0.083318	0.0109288	0.00172399	0.004864	0.00034384	0.00101851	0.00012392	0.000248528	2.76567e-05	0.000176986	2.19907e-05	0.0160183	0.0005252	0.0324565	0.0241315	0.00629674	0.064202	0.0133057	0.798172	0.63615
v-2-15(rim)	11.022	31.5487	12.6437	0.65039	1009.95	0.830945	18.7307	3025.27	636.859	51027.6	78068.1	7079.15	20306.5	1938.18	241.999	854.156	56.0506	157.691	19.2383	40.4528	4.51782	29.953	4.57768	7044.41	132.189	1.25509	0.218646	0.332121	0.0299029	0.0828386	0.00785287	0.000942048	0.00324033	0.000209959	0.000576197	6.94439e-05	0.000145141	1.59218e-05	0.00010372	1.55797e-05	0.0180845	0.000330803	0.0478233	0.0204754	0.00426191	0.0697051	0.0117945	0.747291	0.780914
[truncated: 2 more columns]

## Sheet: monazite
Supplementary Table 1. The chemical compositions of monazite for Huangjiagou carbonatite.
.	Y	Nb	La	Ce	Pr	Nd	Sm	Eu	Gd	Tb	Dy	Ho	Er	Tm	Yb	Lu	Pb	Th	U
	ppm	ppm	ppm	ppm	ppm	ppm	ppm	ppm	ppm	ppm	ppm	ppm	ppm	ppm	ppm	ppm	ppm	ppm	ppm
v-1-01	1877.54	0.0530139	205482	292799	24603.7	75514.5	6611.94	1055.22	2922.1	204.131	635.565	72.7039	103.556	7.14156	23.6356	2.02292	131.739	7284.4	260.585
v-1-02	1364.28	0.50131	207998	292606	23966.9	74882.3	6079.37	988.551	2659.21	171.793	491.716	52.6774	73.3654	4.44008	14.6251	1.14878	141.947	8414.49	323.234
v-1-03	1562	0.0539141	206340	293923	24378.8	74824.5	6408.16	1043.54	2714.49	186.001	551.839	61.4047	86.204	5.83452	18.682	1.58195	130.36	6912.05	260.415
v-1-04	2049.38	0.423628	207978	290195	24415.6	75281.6	6504.25	1084.65	2969.78	214.966	690.717	81.9448	122.302	8.92143	28.8984	2.53981	133.153	7816.58	282.229
v-1-05	1836.33	0.154189	207760	292896	24132.2	74312.8	6306.1	988.838	2764.8	191.844	597.195	70.2296	97.7629	6.90796	22.1065	2.12189	122.422	7110.89	253.76
v-1-06	1573.31	0.408109	207514	292423	24323	75657.8	6443.4	981.624	2816.07	188.25	550.53	61.8522	82.5231	5.38228	16.9658	1.27017	100.535	5904.13	223.654
v-1-07	1980.47	0.078111	208716	293479	24436.4	72725.6	6129.79	1029.53	2674.46	200.822	647.947	77.8394	114.296	8.55742	27.868	2.31363	124.775	6490.18	246.55
v-1-08	1601.92	0.149303	206136	294112	24409.8	74608.8	6186.63	959.428	2644.96	180.552	545.131	60.8059	85.9862	5.87255	20.0982	1.56174	137.803	8035.15	237.857
v-1-09	1541.5	0.0313215	209093	292746	24660.6	72871.6	6324.98	984.562	2705.72	177.115	516.183	58.3013	86.6588	5.25989	19.4794	1.56036	136.409	7430.17	305.509
v-1-10	1786.32	0.374464	203625	299186	24915.6	71425.3	6402.44	1030.93	2760.88	191.332	586.997	67.9206	103.86	7.25342	24.8128	1.88204	124.169	6721.44	282.857
v-1-11	1999.67	0.108475	205851	296393	24680.1	71816	6372.54	1052.07	2866.12	205.161	639.341	73.0189	113.486	8.16105	27.3626	2.43813	125.888	6738.85	279.412
v-1-12	1626.27	0.0973836	206314	294391	25272.7	72842.9	6445.67	1026.21	2819.61	190.024	550.485	61.1246	87.9458	5.30778	18.3721	1.35878	141.905	7735.81	278.187
v-1-13	1711.13	0.155642	208346	295159	24616.2	71526.8	6288.24	1063.34	2741.25	202.319	609.125	68.1422	99.8342	6.43698	20.9702	1.65485	115.176	6062.25	252.689
v-1-14	1722.23	0.0152254	205746	295033	24351.9	73810.3	6611.59	1067.19	2914.22	208.689	635.082	68.4238	100.571	6.20282	20.7182	1.41292	117.224	6525.88	210.548
v-1-15	2009.45	0.380081	208463	294082	24802.7	71210.4	6368.4	1045.64	2833.14	207.827	654.226	77.0625	117.406	7.7984	28.4525	2.23622	126.395	7106.71	272.837
v-1-16	2769.48	0.10557	205055	294430	24607.3	72399.9	6804.41	1169.34	3274.16	260.358	861.829	106.87	173.141	12.4735	45.5988	3.41178	131.166	6897.41	291.418
v-1-17	1684.97	0.0147128	207327	297808	24264.7	70505.3	6095.18	1020.57	2700.11	189.442	583.664	65.7798	98.9553	6.96142	23.5384	1.4479	118.081	6237.39	218.657
v-1-18	2042.57	0.0579698	205657	295191	24820.4	72570.4	6611.15	1097.14	2936.72	212.824	662.567	76.5938	116.655	8.36028	29.0541	2.26121	126.016	6854.81	318.715
v-1-19	1360.61	0.0552024	208323	295551	24599	71917.4	6143.47	945.898	2524.61	165.946	471.159	52.715	81.4421	5.22669	16.3621	1.38845	116.103	6728.66	263.866
v-1-20	1613.94	0.0845509	207046	297309	24559.6	70800.9	6141.38	999.302	2647.29	178.703	541.107	62.4198	90.1357	6.11316	21.1453	1.49428	129.376	6884.48	312.838
v-1-21	1833.22	0.0705599	208666	294188	24481.8	71613.9	6361.6	1037.81	2768.06	200.135	622.278	70.0067	110.194	7.26698	26.4953	1.94205	133.151	6985.5	264.778
v-1-22	1506.35	0.0163609	205377	294616	25125.2	74317.6	6474.73	991.882	2805.39	184.786	532.358	58.6707	82.3763	5.11484	16.0956	1.21882	118.619	6931.19	269.097
v-1-23	1950.37	0.0560254	206834	295200	24657.5	71889	6396.1	1052.58	2885.55	202.433	623.308	72.6386	113.74	7.62936	27.7233	2.26831	134.082	7092.16	306.151
v-1-24	2125.72	1.25941	206723	295284	24587.9	71866.8	6406.17	1093.32	2899.48	219.181	670.337	80.7222	125.323	8.91869	35.2273	2.71824	127.772	6651.04	286.27
v-1-25	2000.59	0.198341	206836	295607	24751.2	71374	6492.4	1057.22	2919.96	207.296	642.188	73.7729	115.332	8.29203	28.5703	2.61772	120.682	6691.21	279.029
v-1-26	1845.35	0.0696075	206015	298011	24615.2	70801.5	6167.9	1053.98	2755.12	199.73	627.36	70.3029	113.837	7.44454	24.8182	1.94304	119.88	6326.95	251.257
v-2-01	1396.49	0.235657	197366	302331	24588.3	75252.9	6642.63	870.02	2610.76	172.069	505.324	55.1351	83.195	5.99415	19.1936	1.61939	126.185	7415.75	229.393
v-2-02	1600.76	0.452336	196356	302163	24686.6	75925.1	6656.2	923.334	2673.33	190.142	567.383	62.693	94.4444	6.20738	20.9023	1.7684	123.538	7341.05	249.675
v-2-03	2313.55	0.112973	191920	302656	25070.1	77313	7786.15	1221.37	3269.29	254.08	827.629	93.773	140.841	9.99233	34.2932	2.58293	107.276	5322.89	216.713
v-2-04	2922.18	0.415964	193089	302384	24885.6	75572.1	7439.87	1187.95	3323.18	275.373	945.257	111.703	176.934	13.3711	47.942	4.01093	121.186	6197.26	274.459
v-2-05	2067.36	0.0811497	198901	303225	24490	72729.8	6615.98	1027.03	2730.63	205.678	678.071	77.8462	120.479	8.67924	26.7346	2.31747	102.035	5143	262.695
v-2-06	2084.4	0.455003	197484	300795	24320.7	75455.3	7056.53	978.951	2903.67	217.715	696.174	81.776	124.739	9.32817	32.9802	2.49692	119.961	6617.16	232.824
v-2-07	2097.58	0.0966713	193177	304846	24598.7	75507.7	7120.68	1071.09	2912.06	220.795	711.842	82.2462	127.586	9.25935	32.443	2.3368	111.946	6056.72	250.339
v-2-08	3199.69	0.0740947	194563	303228	24458.9	73607.6	7357.38	1189.04	3247.72	278.941	993.628	120.344	194.14	15.3505	53.3352	4.16203	111.949	5836.73	251.16
v-2-09	1605.85	0.164759	199679	299822	24462	75479	6937.67	1001.14	2756.79	196.005	584.445	61.2193	85.9645	5.36083	17.2364	1.33697	110.393	5725.46	273.761
v-2-10	1973.86	0.747913	193218	304181	24662.5	76137.4	7129.82	1057.61	2948.22	216.428	683.817	75.9734	110.338	7.78915	25.5048	1.96712	117.864	6237.41	283.773
v-2-11	2683.15	0.681415	197853	299865	24379.4	74660.2	7288.65	1139.22	3116.59	259.838	872.642	100.372	156.577	11.7236	40.0155	3.28025	120.204	6056.28	296.099
v-2-12	2084.94	0.0720031	201958	301830	24105	71727.5	6531.63	995.026	2645.29	203.723	677.288	79.958	127.767	9.3901	32.2787	2.51493	98.8286	4897.63	250.916
v-2-13	1697.62	0.101707	205395	296572	24748.9	73182.8	6340.89	1021.25	2710.06	185.846	570.646	65.6115	99.0751	6.46962	22.089	1.83791	111.767	5765.78	287.824
v-2-14	1672.13	0.0534131	203387	295152	25419.8	75648.8	6613.73	1067.21	2837.08	198.345	583.826	66.5754	93.22	5.81274	19.0606	1.5541	109.858	5578.83	276.912
v-2-15	1278.56	0.525196	209430	291756	25033.7	74467.9	6114.52	901.673	2624.61	167.454	458.604	51.1146	70.1428	4.07115	15.2237	1.21189	116.749	6404.93	246.8
v-2-16	1978.87	0.247726	203947	295610	25503.3	74152.3	6416.07	1073.55	2900.23	208.471	654.482	76.4113	114.96	8.01381	28.4009	2.31344	113.101	5649.85	292.468
v-2-17	1780.33	0.104664	202006	295901	25132	76102.6	6833.08	1151.07	3027.59	221.471	666.606	73.0404	98.0937	6.30207	19.7596	1.46874	103.197	5091.95	255
v-2-18	1859.95	0.442177	205260	293802	25335.5	74436.5	6532.7	1014.57	2854.88	202.303	619.569	72.9284	107.937	7.60904	27.133	2.35069	126.904	6786.69	272.217
v-2-19	1744.53	3.02356	204487	294912	24634.5	75104.3	6696.59	1048.98	2889.81	204.782	621.922	69.819	100.398	6.90246	23.8584	1.79448	124.384	5984.75	264.828
v-2-20	1371.22	4.09706	204617	295381	24867.4	74273.5	6177.76	909.559	2636.29	170.508	482.606	54.5533	76.6035	4.8239	17.621	1.34556	152.214	9070.59	273.229
v-2-21	1315.9	1.00413	207115	292159	24760.5	75361	6278.26	920.926	2731.33	170.833	480.27	52.2082	71.6039	4.37227	15.3354	1.17835	144.086	8341.87	244.887
v-2-22	1448.58	0.20645	205336	294412	24371.8	75506.9	6368.96	965.398	2757.74	180.97	522.682	57.5738	83.2861	5.21303	16.6159	1.43547	122.502	7105.38	264.01
v-2-23	3400.12	0.13609	204801	293728	24602.2	72782	7042.78	1246.71	3527.95	298.677	1080.41	132.544	213.79	16.2857	61.5134	5.38266	97.4406	4878.58	278.659
v-2-24	2955.88	0.0190634	202253	294319	24782.4	74732.6	7177.03	1237.2	3316.67	270.865	928.983	111.486	170.231	13.3539	49.0556	4.03892	108.208	6255.26	295.89
v-2-25	1809.42	0.811256	202896	294749	25146.2	76013.5	6906.99	1096.36	2824.77	198.797	598.235	66.1049	94.8117	6.15016	20.8815	1.68501	112.225	6221.21	308.95
v-2-26	1240.71	0.582631	205126	292897	24689	75885	6334.61	850.866	2500.06	156.237	451.368	47.4562	63.7581	4.56807	15.6079	1.1267	144.155	10782.5	247.598
v-2-27	1453.43	1.51343	209390	290922	24407.1	73029.3	6218.6	840.101	2491.41	168.528	500.819	55.9463	77.1542	5.65364	18.5186	1.48325	163.175	12021.7	249.735
v-2-28	2112.96	0.23472	204689	292213	24851.5	75612.6	6896.05	1045.23	2980.11	218.79	709.179	81.1123	111.063	8.76574	26.4551	2.25849	120.413	7994.41	261.73
v-2-29	2109.19	0.191068	204943	292454	24643.1	74920.4	6827.53	1024.07	2875.99	212.669	689.05	78.8116	117.655	8.61007	32.4956	2.90524	137.207	9206.52	278.614
v-2-30	1695.19	0.155888	203463	294165	24719.3	76553.9	6848.76	1021.19	2904.27	198.774	599.322	63.1607	87.0275	5.88182	20.1123	1.42743	105.63	6483.58	262.807
v-2-31	1779.71	0.0329869	202638	296022	24718	75104.6	6993.91	1057.17	2972.94	203.886	607.418	67.468	91.428	5.96362	21.5184	1.47969	110.858	6522.47	279.988
v-2-32	1455.35	0.213348	201613	294509	25209.8	77855.3	6875.71	927.476	2806.78	180.934	511.682	54.6684	72.963	5.26169	18.9739	1.61398	116.491	7083.86	242.238
v-2-33	1804.93	0.226438	202504	293604	25070.6	76962.1	7061.7	1101.78	2954.59	207.275	638.01	67.8339	94.2244	6.27206	20.7733	1.72991	118.678	6943.98	298.264
v-2-34	3028.39	0.0163875	199575	291723	25330.4	78372.3	7808.82	1326.29	3610.2	287.449	972.221	117.861	171.47	13.9971	49.028	4.11294	112.848	6220.22	315.945
v-2-35	1027.68	0.52033	207421	293099	24163.5	75451.9	6136.2	767.141	2316.58	137.661	386.453	39.2382	51.3306	3.46103	12.6602	1.20156	123.841	9288.11	218.17
v-2-36	1676.99	0.601832	203656	293096	24579.4	76755.6	6957.07	957.78	2845.17	192.586	571.893	62.6211	89.0448	6.64777	22.767	2.05307	123.83	8288.97	241.876
v-2-37	1330.84	0.262905	205814	292591	24591.1	76004.2	6600.4	892.286	2670.38	166.574	477.231	51.2976	68.1407	4.69618	15.3487	1.19946	124.135	8704.54	243.137
v-2-38	2352.92	0.969652	196099	302954	24668.1	74298.2	7045.07	1074.6	2940.29	231.864	762.987	89.8902	144.187	10.599	33.9004	2.76008	122.772	5536.4	276.681
v-2-39	1690.66	5.2837	207389	292959	24748.6	74253.1	6327.45	954.243	2713.57	189.625	581.94	66.1962	98.9374	7.24227	23.3939	2.06302	138.671	7073.87	242.47
v-2-40	1233.78	4.18633	202697	298133	25566.6	74683.4	5960.33	909.233	2401.13	155.15	442.292	47.9543	68.2406	4.46158	16.4103	1.0753	139.78	6514.64	246.491
v-2-41	1760.68	5.6346	205565	296174	24942.7	72528.7	6318.15	1012	2796.27	199.842	621.145	70.3456	105.365	7.23811	28.6191	2.42118	148.248	6715.29	265.353
v-2-42	3540.28	2.76923	203864	292272	24593.2	74349.1	7367.13	1348.45	3708.44	318.84	1124.71	140.69	227.398	18.0328	66.306	5.92082	125.263	4915.09	241.141
